# Supplementary material for: Kinetic Modification on Hydrogen Desorption of Lithium Hydride and Magnesium Amide System
Source: MDPI journal article supplement (doi:10.3390/ma8073896), 2015-06-29
Supplement: s1 [file s1]

## Supplementary Materials

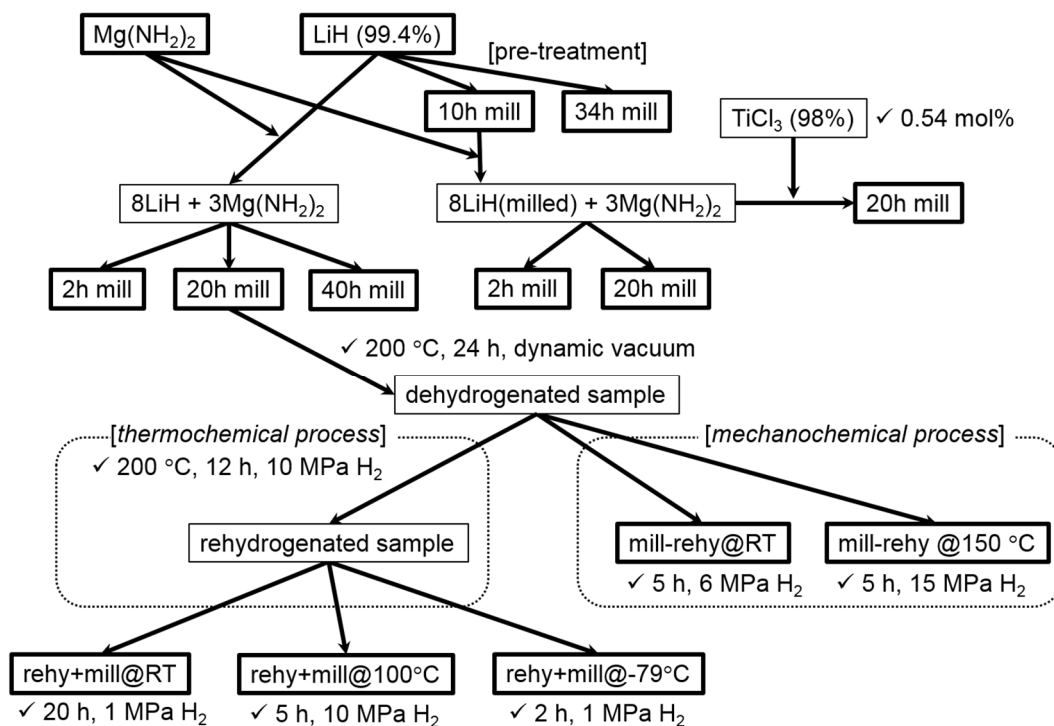

**Figure S1.** Flowchart for the sample preparation.

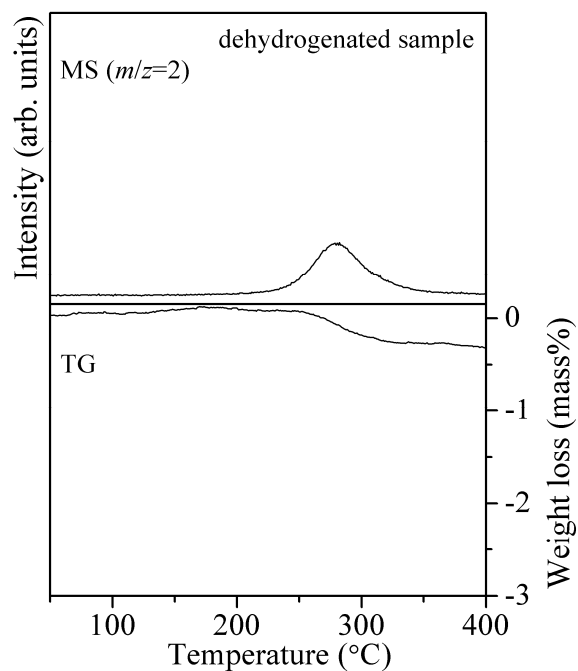

**Figure S2.** TG-MS profiles of the  $8\text{LiH}-3\text{Mg}(\text{NH}_2)_2$  samples after the dehydrogenation at 200 °C under dynamic vacuum condition for 24 h.
